# Supplementary material for: Faking von Persönlichkeitseigenschaften bei Zulassungsverfahren für Lehramtsstudien
Source: Atypon-hosted journal article supplement (doi:10.1024/1010-0652/a000161), 2015-10-01
Supplement: 1010-0652_a000161esm1.pdf [file 1010-0652_a000161esm1.pdf]

## 1 Online Supplement

Tabelle 2:

*Die Interkorrelationen der 18 IPS-Skalen zur Zulassung (t1) für die gesamte Stichprobe.*

|    | 2    | 3    | 4    | 5    | 6    | 7    | 8    | 9    | 10   | 11   | 12   | 13   | 14   | 15   | 16   | 17   | 18   |
|----|------|------|------|------|------|------|------|------|------|------|------|------|------|------|------|------|------|
| 1  | -.14 | .26  | -.21 | .13  | .10  | .34  | .11  | .27  | -.18 | .26  | .17  | .42  | .12  | .12  | .18  | .16  | .29  |
| 2  |      | -.07 | .60  | -.08 | -.38 | -.23 | -.30 | -.29 | .40  | -.46 | -.10 | -.39 | -.49 | -.28 | -.36 | -.45 | -.41 |
| 3  |      |      | -.14 | .21  | .20  | .36  | .16  | .20  | -.10 | .29  | .20  | .34  | .12  | .20  | .19  | .27  | .39  |
| 4  |      |      |      | -.26 | -.32 | -.32 | -.30 | -.25 | .40  | -.33 | -.12 | -.44 | -.41 | -.32 | -.42 | -.33 | -.49 |
| 5  |      |      |      |      | .33  | .24  | .02  | .28  | -.25 | .17  | .29  | .33  | .25  | .45  | .17  | .38  | .25  |
| 6  |      |      |      |      |      | .26  | .31  | .37  | -.41 | .28  | .36  | .29  | .42  | .49  | .44  | .40  | .36  |
| 7  |      |      |      |      |      |      | .27  | .29  | -.34 | .37  | .32  | .35  | .28  | .13  | .48  | .33  | .37  |
| 8  |      |      |      |      |      |      |      | .25  | -.33 | .43  | .33  | .12  | .24  | .26  | .54  | .37  | .26  |
| 9  |      |      |      |      |      |      |      |      | -.30 | .38  | .28  | .30  | .36  | .32  | .28  | .57  | .43  |
| 10 |      |      |      |      |      |      |      |      |      | -.36 | -.46 | -.24 | -.42 | -.45 | -.39 | -.37 | -.41 |
| 11 |      |      |      |      |      |      |      |      |      |      | .31  | .25  | .38  | .34  | .38  | .61  | .38  |
| 12 |      |      |      |      |      |      |      |      |      |      |      | .18  | .16  | .32  | .37  | .32  | .36  |
| 13 |      |      |      |      |      |      |      |      |      |      |      |      | .27  | .20  | .24  | .33  | .57  |
| 14 |      |      |      |      |      |      |      |      |      |      |      |      |      | .44  | .31  | .54  | .32  |
| 15 |      |      |      |      |      |      |      |      |      |      |      |      |      |      | .25  | .48  | .24  |
| 16 |      |      |      |      |      |      |      |      |      |      |      |      |      |      |      | .60  | .63  |
| 17 |      |      |      |      |      |      |      |      |      |      |      |      |      |      |      |      | .60  |

Anmerkung: 1 = Aktivität in vertrauter kommunikativer Situation; 2 = Beharrungstendenz bei Umstellungserfordernis; 3 = Durchsetzung in einer Führungsrolle; 4 = Empfindlichkeit bei sozialer Frustration; 5 = Engagement bei hoher Leistungsanforderung; 6 = Entspannungsfähigkeit nach dem Arbeitstag; 7 = Aktives Erholungsverhalten in der Freizeit; 8 = Gesundheitsvorsorge bei Warnsignalen; 9 = Karriere- und Risikobereitschaft bei beruflicher Herausforderung; 10 = Konfrontationstendenz in sozialer Konfliktsituation; 11 = Optimismus gegenüber alltäglicher Anforderung; 12 = Rücksichtnahme bei sozialer Verantwortung; 13 = Selbstbehauptung bei Kommunikationserfordernis; 14 = Selbstvertrauen bei Prüfungsanforderung; 15 = Stabilität bei stressvoller Anforderung; 16 = Zufriedenheit mit dem sozial-kommunikativen Verhalten; 17 = Zufriedenheit mit dem Leistungsverhalten; 18 = Zufriedenheit mit dem Gesundheits- und Erholungsverhalten. Bei einer Stichprobengröße von 116 ist eine Korrelation ab  $\pm 0.182$  signifikant.
