# Supplementary material for: Faking von Persönlichkeitseigenschaften bei Zulassungsverfahren für Lehramtsstudien
Source: Atypon-hosted journal article supplement (doi:10.1024/1010-0652/a000161), 2015-10-01
Supplement: 1010-0652_a000161esm2.pdf [file 1010-0652_a000161esm2.pdf]

Tabelle 3:

Die Interkorrelationen der 18 IPS-Skalen zur Zulassung (oberes Dreieck) und Nacherhebung (unteres Dreieck) für die honest-Bedingung samt interner Konsistenz ( $\alpha$ ) zur Nacherhebung.

|    | 1    | 2    | 3    | 4    | 5    | 6    | 7    | 8    | 9    | 10   | 11   | 12   | 13   | 14   | 15   | 16   | 17   | 18   | $\alpha$ |
|----|------|------|------|------|------|------|------|------|------|------|------|------|------|------|------|------|------|------|----------|
| 1  |      | .00  | .30  | -.01 | -.08 | -.20 | .23  | -.06 | .02  | -.02 | .11  | .01  | .31  | .09  | .03  | -.03 | .07  | .19  | .79      |
| 2  | -.16 |      | .19  | .47  | -.07 | -.13 | -.11 | -.44 | -.13 | .32  | -.48 | -.14 | -.23 | -.17 | -.22 | -.31 | -.42 | -.25 | .64      |
| 3  | .10  | -.01 |      | -.09 | .17  | .11  | .43  | -.08 | .20  | -.05 | .14  | -.03 | .35  | .07  | .13  | .12  | .23  | .38  | .69      |
| 4  | -.01 | .23  | -.22 |      | -.35 | -.22 | -.13 | -.23 | -.12 | .41  | -.24 | -.22 | -.36 | -.40 | -.23 | -.24 | -.28 | -.37 | .70      |
| 5  | -.10 | -.08 | .34  | -.25 |      | .54  | .26  | -.14 | .31  | -.25 | .15  | .32  | .19  | .37  | .51  | .00  | .42  | .16  | .85      |
| 6  | -.30 | .03  | .11  | -.07 | .20  |      | .11  | .19  | .23  | -.34 | .04  | .28  | .20  | .33  | .46  | .18  | .24  | .07  | .79      |
| 7  | .16  | -.16 | .15  | .05  | -.03 | .23  |      | -.03 | .52  | -.10 | .26  | .14  | .27  | .16  | .24  | .29  | .44  | .29  | .76      |
| 8  | .10  | .15  | -.02 | -.47 | -.19 | -.03 | -.03 |      | -.03 | -.13 | .32  | .14  | .15  | .14  | .17  | .49  | .22  | .06  | .67      |
| 9  | .03  | .01  | .33  | -.09 | .40  | .39  | .01  | -.03 |      | -.22 | .35  | .28  | .24  | .52  | .49  | .14  | .59  | .26  | .87      |
| 10 | .27  | .03  | -.19 | .24  | -.12 | -.36 | -.08 | -.44 | -.20 |      | -.21 | -.59 | -.16 | -.37 | -.43 | .04  | -.21 | -.10 | .83      |
| 11 | .08  | .12  | .45  | -.22 | .27  | .20  | .20  | .09  | .00  | -.05 |      | .15  | .25  | .24  | .47  | .32  | .67  | .36  | .72      |
| 12 | -.25 | -.02 | .01  | .11  | .31  | .08  | -.09 | -.26 | .13  | -.25 | -.21 |      | .14  | .22  | .44  | .12  | .26  | .26  | .66      |
| 13 | .25  | -.38 | .20  | -.41 | -.07 | -.28 | -.12 | .16  | -.03 | -.01 | .03  | -.07 |      | .20  | .12  | -.02 | .26  | .39  | .86      |
| 14 | -.04 | -.08 | .31  | -.18 | .41  | .48  | .25  | .01  | .59  | -.23 | .32  | .22  | .03  |      | .46  | .02  | .43  | -.01 | .87      |
| 15 | -.14 | -.22 | .51  | -.33 | .63  | .32  | -.05 | -.19 | .54  | -.34 | .13  | .45  | .16  | .45  |      | .07  | .48  | .10  | .82      |
| 16 | -.09 | .25  | .05  | .00  | -.24 | .55  | .31  | .45  | .05  | -.33 | .24  | -.23 | -.19 | .06  | -.14 |      | .47  | .53  | .17      |
| 17 | -.18 | -.16 | .42  | -.18 | .40  | .40  | .18  | -.06 | .60  | -.16 | .31  | .06  | .08  | .66  | .56  | .18  |      | .59  | .58      |
| 18 | -.04 | -.21 | .59  | -.31 | .12  | .17  | .14  | -.02 | .08  | -.29 | .21  | .08  | .45  | .32  | .40  | .21  | .51  |      | .40      |

Anmerkung: 1 = Aktivität in vertrauter kommunikativer Situation; 2 = Beharrungstendenz bei Umstellungserfordernis; 3 = Durchsetzung in einer Führungsrolle; 4 = Empfindlichkeit bei sozialer Frustration; 5 = Engagement bei hoher Leistungsanforderung; 6 = Entspannungsfähigkeit nach dem Arbeitstag; 7 = Aktives Erholungsverhalten in der Freizeit; 8 = Gesundheitsvorsorge bei Warnsignalen; 9 = Karriere- und Risikobereitschaft bei beruflicher Herausforderung; 10 = Konfrontationstendenz in sozialer Konfliktsituation; 11 = Optimismus gegenüber alltäglicher Anforderung; 12 = Rücksichtnahme bei sozialer Verantwortung; 13 = Selbstbehauptung bei Kommunikationserfordernis; 14 = Selbstvertrauen bei Prüfungsanforderung; 15 = Stabilität bei stressvoller Anforderung; 16 = Zufriedenheit mit dem sozial-kommunikativen Verhalten; 17 = Zufriedenheit mit dem Leistungsverhalten; 18 = Zufriedenheit mit dem Gesundheits- und Erholungsverhalten.

Bei einer Stichprobengröße von 36 ist eine Korrelation ab  $\pm 0.329$  signifikant.
