# Supplementary material for: Faking von Persönlichkeitseigenschaften bei Zulassungsverfahren für Lehramtsstudien
Source: Atypon-hosted journal article supplement (doi:10.1024/1010-0652/a000161), 2015-10-01
Supplement: 1010-0652_a000161esm3.pdf [file 1010-0652_a000161esm3.pdf]

Tabelle 4:

Die Interkorrelationen der 18 IPS-Skalen zur Zulassung (oberes Dreieck) und Nacherhebung (unteres Dreieck) für die wie-damals-Bedingung samt interner Konsistenz ( $\alpha$ ) zur Nacherhebung.

|    | 1    | 2    | 3    | 4    | 5    | 6    | 7    | 8    | 9    | 10   | 11   | 12   | 13   | 14   | 15   | 16   | 17   | 18   | $\alpha$ |
|----|------|------|------|------|------|------|------|------|------|------|------|------|------|------|------|------|------|------|----------|
| 1  |      | -.11 | .19  | -.13 | .32  | .27  | .38  | .26  | .31  | -.32 | .41  | .08  | .33  | .14  | .22  | .22  | .18  | .44  | .64      |
| 2  | -.04 |      | -.06 | .56  | -.18 | -.38 | -.31 | -.28 | -.09 | .50  | -.32 | .08  | -.37 | -.53 | -.48 | -.16 | -.24 | -.15 | .76      |
| 3  | .46  | -.19 |      | -.10 | .28  | .10  | .30  | .31  | .28  | .06  | .23  | .15  | .21  | -.06 | .06  | .09  | .23  | .46  | .75      |
| 4  | -.08 | .42  | -.25 |      | -.30 | -.30 | -.35 | -.29 | -.05 | .51  | -.27 | -.05 | -.36 | -.49 | -.54 | -.27 | -.25 | -.36 | .66      |
| 5  | .24  | -.37 | .34  | -.30 |      | .40  | .43  | .26  | .15  | -.24 | .39  | .29  | .54  | .36  | .49  | .33  | .48  | .50  | .62      |
| 6  | .16  | -.33 | .26  | -.07 | .24  |      | .32  | .46  | .34  | -.41 | .28  | .41  | .41  | .36  | .60  | .50  | .45  | .41  | .76      |
| 7  | .36  | -.25 | .26  | .04  | .22  | .45  |      | .42  | .10  | -.41 | .49  | .29  | .37  | .35  | .27  | .56  | .38  | .43  | .65      |
| 8  | .17  | -.32 | .35  | -.01 | .17  | .57  | .44  |      | .35  | -.50 | .61  | .49  | .15  | .21  | .45  | .74  | .61  | .42  | .88      |
| 9  | .34  | -.56 | .22  | -.26 | .21  | .43  | .27  | .36  |      | -.25 | .27  | .21  | .24  | .17  | .36  | .17  | .50  | .40  | .81      |
| 10 | -.29 | .27  | -.07 | .29  | -.19 | .00  | -.31 | -.30 | -.11 |      | -.33 | -.36 | -.36 | -.47 | -.50 | -.48 | -.40 | -.50 | .72      |
| 11 | .23  | -.35 | .23  | -.18 | .16  | .29  | .43  | .23  | .44  | -.21 |      | .28  | .20  | .33  | .41  | .43  | .65  | .29  | .78      |
| 12 | .19  | -.05 | -.05 | -.01 | .30  | .01  | .29  | .11  | .08  | -.41 | .31  |      | .10  | .02  | .30  | .46  | .45  | .39  | .80      |
| 13 | .32  | -.58 | .32  | -.09 | .37  | .35  | .37  | .21  | .29  | -.09 | .25  | .09  |      | .24  | .30  | .16  | .35  | .65  | .88      |
| 14 | .13  | -.47 | .19  | -.42 | .16  | .17  | .13  | .15  | .39  | -.36 | .24  | .16  | .30  |      | .50  | .31  | .45  | .29  | .79      |
| 15 | -.10 | -.52 | .19  | -.30 | .52  | .33  | .32  | .26  | .29  | -.12 | .45  | .16  | .27  | .44  |      | .41  | .53  | .28  | .83      |
| 16 | .10  | -.14 | .17  | .13  | .15  | .49  | .58  | .69  | .21  | -.28 | .22  | .32  | .21  | .19  | .28  |      | .69  | .49  | .57      |
| 17 | .11  | -.55 | .22  | -.21 | .49  | .39  | .30  | .52  | .52  | -.36 | .43  | .43  | .39  | .57  | .62  | .64  |      | .58  | .72      |
| 18 | .26  | -.35 | .42  | -.31 | .33  | .31  | .30  | .47  | .15  | -.46 | .26  | .42  | .54  | .30  | .26  | .57  | .67  |      | .73      |

Anmerkung: 1 = Aktivität in vertrauter kommunikativer Situation; 2 = Beharrungstendenz bei Umstellungserfordernis; 3 = Durchsetzung in einer Führungsrolle; 4 = Empfindlichkeit bei sozialer Frustration; 5 = Engagement bei hoher Leistungsanforderung; 6 = Entspannungsfähigkeit nach dem Arbeitstag; 7 = Aktives Erholungsverhalten in der Freizeit; 8 = Gesundheitsvorsorge bei Warnsignalen; 9 = Karriere- und Risikobereitschaft bei beruflicher Herausforderung; 10 = Konfrontationstendenz in sozialer Konfliktsituation; 11 = Optimismus gegenüber alltäglicher Anforderung; 12 = Rücksichtnahme bei sozialer Verantwortung; 13 = Selbstbehauptung bei Kommunikationserfordernis; 14 = Selbstvertrauen bei Prüfungsanforderung; 15 = Stabilität bei stressvoller Anforderung; 16 = Zufriedenheit mit dem sozial-kommunikativen Verhalten; 17 = Zufriedenheit mit dem Leistungsverhalten; 18 = Zufriedenheit mit dem Gesundheits- und Erholungsverhalten.

Bei einer Stichprobengröße von 39 ist eine Korrelation ab  $\pm 0.316$  signifikant.
