# Supplementary material for: Faking von Persönlichkeitseigenschaften bei Zulassungsverfahren für Lehramtsstudien
Source: Atypon-hosted journal article supplement (doi:10.1024/1010-0652/a000161), 2015-10-01
Supplement: 1010-0652_a000161esm4.pdf [file 1010-0652_a000161esm4.pdf]

Tabelle 5:

Die Interkorrelationen der 18 IPS-Skalen zur Zulassung (oberes Dreieck) und Nacherhebung (unteres Dreieck) für die Faking-good-Bedingung samt interner Konsistenz ( $\alpha$ ) zur Nacherhebung.

|    | 1    | 2    | 3    | 4    | 5    | 6    | 7    | 8    | 9    | 10   | 11   | 12   | 13   | 14   | 15   | 16   | 17   | 18   | $\alpha$ |
|----|------|------|------|------|------|------|------|------|------|------|------|------|------|------|------|------|------|------|----------|
| 1  |      | -.28 | .27  | -.43 | .15  | .28  | .47  | .14  | .39  | -.17 | .30  | .45  | .62  | .30  | .07  | .40  | .38  | .37  | .46      |
| 2  | -.45 |      | -.32 | .74  | -.07 | -.51 | -.27 | -.31 | -.56 | .41  | -.68 | -.32 | -.57 | -.60 | -.26 | -.56 | -.57 | -.63 | .69      |
| 3  | .11  | -.14 |      | -.25 | .28  | .31  | .38  | .22  | .18  | -.31 | .43  | .40  | .51  | .39  | .40  | .35  | .41  | .49  | .73      |
| 4  | -.57 | .66  | -.08 |      | -.19 | -.54 | -.34 | -.25 | -.63 | .47  | -.49 | -.39 | -.62 | -.49 | -.34 | -.67 | -.63 | -.70 | .62      |
| 5  | .20  | -.47 | .07  | -.38 |      | .19  | .00  | -.02 | .36  | -.35 | .14  | .42  | .31  | .12  | .54  | .14  | .49  | .32  | .88      |
| 6  | .38  | -.55 | .15  | -.66 | .27  |      | .42  | .21  | .58  | -.60 | .50  | .39  | .41  | .51  | .38  | .54  | .56  | .55  | .58      |
| 7  | .20  | -.31 | .35  | -.32 | .35  | .53  |      | .33  | .37  | -.39 | .31  | .48  | .43  | .36  | .10  | .52  | .31  | .39  | .49      |
| 8  | .15  | -.08 | .42  | -.18 | .20  | .39  | .49  |      | .39  | -.40 | .46  | .20  | .25  | .36  | .28  | .49  | .33  | .36  | .51      |
| 9  | .56  | -.65 | .25  | -.73 | .39  | .64  | .46  | .39  |      | -.53 | .61  | .37  | .51  | .47  | .22  | .49  | .67  | .58  | .79      |
| 10 | -.47 | .77  | -.20 | .58  | -.32 | -.33 | -.11 | -.16 | -.61 |      | -.61 | -.50 | -.31 | -.53 | -.53 | -.50 | -.65 | -.63 | .84      |
| 11 | .37  | -.35 | .21  | -.38 | .23  | .24  | .24  | .06  | .35  | -.36 |      | .42  | .48  | .58  | .36  | .43  | .60  | .59  | .27      |
| 12 | .39  | -.57 | .33  | -.47 | .33  | .40  | .40  | .25  | .61  | -.53 | .35  |      | .49  | .30  | .34  | .50  | .49  | .59  | .74      |
| 13 | .57  | -.65 | .13  | -.65 | .44  | .43  | .23  | .23  | .69  | -.72 | .41  | .57  |      | .45  | .26  | .57  | .56  | .69  | .78      |
| 14 | .54  | -.44 | .12  | -.63 | .23  | .30  | .19  | .28  | .56  | -.52 | .35  | .46  | .72  |      | .42  | .42  | .72  | .56  | .65      |
| 15 | .47  | -.79 | .23  | -.66 | .58  | .69  | .44  | .23  | .63  | -.58 | .31  | .51  | .52  | .40  |      | .19  | .51  | .36  | .86      |
| 16 | .54  | -.65 | .23  | -.66 | .45  | .58  | .38  | .40  | .79  | -.57 | .33  | .38  | .73  | .59  | .64  |      | .64  | .75  | .19      |
| 17 | .62  | -.71 | .18  | -.67 | .56  | .51  | .35  | .36  | .76  | -.68 | .44  | .58  | .73  | .63  | .78  | .81  |      | .78  | .84      |
| 18 | .52  | -.78 | .29  | -.71 | .57  | .49  | .37  | .25  | .78  | -.71 | .41  | .58  | .72  | .62  | .81  | .75  | .86  |      | .89      |

Anmerkung: 1 = Aktivität in vertrauter kommunikativer Situation; 2 = Beharrungstendenz bei Umstellungserfordernis; 3 = Durchsetzung in einer Führungsrolle; 4 = Empfindlichkeit bei sozialer Frustration; 5 = Engagement bei hoher Leistungsanforderung; 6 = Entspannungsfähigkeit nach dem Arbeitstag; 7 = Aktives Erholungsverhalten in der Freizeit; 8 = Gesundheitsvorsorge bei Warnsignalen; 9 = Karriere- und Risikobereitschaft bei beruflicher Herausforderung; 10 = Konfrontationstendenz in sozialer Konfliktsituation; 11 = Optimismus gegenüber alltäglicher Anforderung; 12 = Rücksichtnahme bei sozialer Verantwortung; 13 = Selbstbehauptung bei Kommunikationserfordernis; 14 = Selbstvertrauen bei Prüfungsanforderung; 15 = Stabilität bei stressvoller Anforderung; 16 = Zufriedenheit mit dem sozial-kommunikativen Verhalten; 17 = Zufriedenheit mit dem Leistungsverhalten; 18 = Zufriedenheit mit dem Gesundheits- und Erholungsverhalten.

Bei einer Stichprobengröße von 41 ist eine Korrelation ab  $\pm 0.308$  signifikant.
